# Supplementary material
Source: MDPI journal article supplement (https://www.mdpi.com/2624-795X/4/4/21)
Supplement: s1 [file s1]

# Is sea level rise a known threat? A discussion based on an online survey

Stefano Solarino <sup>1\*</sup>, Elena Eva <sup>1</sup>, Marco Anzidei <sup>2</sup>, Gemma Musacchio <sup>3</sup> and Maddalena De Lucia <sup>4</sup>

## Supplementary Materials:

The video about the mission of the SAVEMEDCOASTS-2 project can be downloaded at <https://youtu.be/LH0mcjpbkT4>.

All the materials produced by the SAVEMEDCOASTS-2 project can be downloaded at <https://www.savemedcoasts2.eu/index.php/en/>.

The questionnaire reported in this work can be viewed and filled out at [https://docs.google.com/forms/d/15eLVN2\\_OlyV3vHJYAFnu2l5DYDBM3NGPLu3evZhrKbs/edit](https://docs.google.com/forms/d/15eLVN2_OlyV3vHJYAFnu2l5DYDBM3NGPLu3evZhrKbs/edit).

## Questionnaire on Sea Level Rise

Among consequences of climate change the rise of sea level is probably the least known. We would like to learn what you know about Sea Level Rise and how do you think it would be possible to cope with it. The questionnaire is anonymous and it only takes 5 minutes of your time to fill it. Please, help us in our research.

All information you provide will be stored securely for the duration of the SAVEMEDCOASTS-2 project (<https://www.savemedcoasts2.eu/index.php/en/>) and will not be shared with third parties (as required by the European Union's General Data Protection Regulation, EU GDPR). Your answers will be used for scientific publications where the identity of the respondent will remain hidden.

\* Mandatory answer

1. Where do you live (city, country)? \*

Write the city and the country separated by a comma

---

2. Have you ever heard about the Sea Level Rise? \*

☐ Yes

☐ No

3. Where have you heard about sea level rise? (Tick the answers that apply.) \*

☐ Radio

☐ Television

☐ Newspapers and magazines

☐ Social media (instagram, facebook, youtube)

☐ Internet (Google or other search engines)

☐ Information from the municipality of residence

☐ Friends/Family

☐ School/University

4. What are the causes of Sea Level Rise? (Tick the answers that apply) \*

- ☐ Glaciers' melting
- ☐ Intense rain
- ☐ Volcanic activity
- ☐ Sinking of coastal areas
- ☐ Earthquakes
- ☐ Global warming

5. What are the consequences of the sea level rise? (Tick the answers that apply) \*

- ☐ Temperature of the Earth rises
- ☐ Thunderstorms become stronger
- ☐ Effects of tidal waves are amplified
- ☐ Beaches get bigger
- ☐ People have to leave their homes forever
- ☐ Water get polluted
- ☐ Coastal areas turn into lakes and swamps
- ☐ The number of earthquakes increases
- ☐ Harbours become unusable

6. Who should mostly work to reduce damage caused by the rising sea levels? Rank the following categories by choosing 1 for the most important, 5 for the least important. \*
- You can set ONLY ONE score to each category

#### HINT FOR THIS ANSWER

Chi dovrebbe maggiormente operare per ridurre i danni provocati dall'innalzamento del livello del mare? Assegna un ordine alle seguenti categorie scegliendo 1 per la più importante, 5 per la meno importante. Puoi assegnare ogni numero ad una sola risposta (colonna). Per esempio, se pensi che la risposta "I cittadini dovrebbero proteggersi da soli" sia relativa all'azione più importante, assegna il numero 1 e così via. Non si possono assegnare ex-aequo. In pratica dovrai inserire una sola risposta per ogni riga ed ogni colonna.

|                    | Gli scienziati d...                 | Gli ingegneri do...                 | I cittadini dove...      | La scuola dov...         | I Governi dove...        |
|--------------------|-------------------------------------|-------------------------------------|--------------------------|--------------------------|--------------------------|
| 1 (Più importan... | <input checked="" type="checkbox"/> | <input checked="" type="checkbox"/> | <input type="checkbox"/> | <input type="checkbox"/> | <input type="checkbox"/> |
| 2                  | <input type="checkbox"/>            | <input type="checkbox"/>            | <input type="checkbox"/> | <input type="checkbox"/> | <input type="checkbox"/> |
| 3                  | <input type="checkbox"/>            | <input type="checkbox"/>            | <input type="checkbox"/> | <input type="checkbox"/> | <input type="checkbox"/> |
| 4                  | <input type="checkbox"/>            | <input type="checkbox"/>            | <input type="checkbox"/> | <input type="checkbox"/> | <input type="checkbox"/> |
| 5 (Meno import...  | <input type="checkbox"/>            | <input type="checkbox"/>            | <input type="checkbox"/> | <input type="checkbox"/> | <input type="checkbox"/> |

Chi dovrebbe maggiormente operare per ridurre i danni provocati dall'innalzamento del livello del mare? Assegna un ordine alle seguenti categorie scegliendo 1 per la più importante, 5 per la meno importante. Puoi assegnare ogni numero ad una sola risposta (colonna). Per esempio, se pensi che la risposta "I cittadini dovrebbero proteggersi da soli" sia relativa all'azione più importante, assegna il numero 1 e così via. Non si possono assegnare ex-aequo. In pratica dovrai inserire una sola risposta per ogni riga ed ogni colonna.

|                    | Gli scienziati d...                 | Gli ingegneri do...                 | I cittadini dove...                 | La scuola dov...                    | I Governi dove...                   |
|--------------------|-------------------------------------|-------------------------------------|-------------------------------------|-------------------------------------|-------------------------------------|
| 1 (Più importan... | <input checked="" type="checkbox"/> | <input type="checkbox"/>            | <input type="checkbox"/>            | <input type="checkbox"/>            | <input type="checkbox"/>            |
| 2                  | <input type="checkbox"/>            | <input type="checkbox"/>            | <input type="checkbox"/>            | <input checked="" type="checkbox"/> | <input type="checkbox"/>            |
| 3                  | <input type="checkbox"/>            | <input type="checkbox"/>            | <input type="checkbox"/>            | <input type="checkbox"/>            | <input checked="" type="checkbox"/> |
| 4                  | <input type="checkbox"/>            | <input checked="" type="checkbox"/> | <input type="checkbox"/>            | <input type="checkbox"/>            | <input type="checkbox"/>            |
| 5 (Meno import...  | <input type="checkbox"/>            | <input type="checkbox"/>            | <input checked="" type="checkbox"/> | <input type="checkbox"/>            | <input type="checkbox"/>            |

**YES. ONE TICK EACH ONE ROW AND COLUMN. THIS IS ONLY AN EXAMPLE!**

Scientists should study sea level rise more accurately

Engineers should design barriers to protect the land

Citizens should protect themselves

The school should teach students about sea level rise is and its consequences

Governments should carry out strict controls on land-use plans

|                           | Gli scienziati d...      | Gli ingegneri do...      | I cittadini dove...      | La scuola dov...         | I Governi dove...        |
|---------------------------|--------------------------|--------------------------|--------------------------|--------------------------|--------------------------|
| <b>1 (More important)</b> | <input type="checkbox"/> |
| <b>2</b>                  | <input type="checkbox"/> |
| <b>3</b>                  | <input type="checkbox"/> |
| <b>4</b>                  | <input type="checkbox"/> |
| <b>5 (Less important)</b> | <input type="checkbox"/> |

7. Rate what do you think we need to do for our cities to adapt to the rising sea levels effects? (one answer per line) \*

|                                               | Fundamental           | Important             | Indifferent           | Not necessary         | Useless               |
|-----------------------------------------------|-----------------------|-----------------------|-----------------------|-----------------------|-----------------------|
| Build barriers                                | <input type="radio"/> |
| Find respectful solutions for the environment | <input type="radio"/> |
| Design better cities                          | <input type="radio"/> |
| Move away from the coast                      | <input type="radio"/> |
| Ban buildings' construction along the coast   | <input type="radio"/> |
| Decrease water supply from rivers             | <input type="radio"/> |

8. What do you think you can do to reduce sea level rise? (Tick the answers that apply) \*

- ☐ Use the car
- ☐ Don't spoil water
- ☐ Choose foods according to season and produced locally (zero-km food)
- ☐ Keep constant temperature in rooms by using radiators and air conditioners
- ☐ Encourage recycling
- ☐ Adopt science based solutions
- ☐ Choose solutions for sustainable mobility (train, metro, bus, bike, foot)

We use this information for statistical purposes only

**Age \***

|           |                       |                       |                       |                       |                       |
|-----------|-----------------------|-----------------------|-----------------------|-----------------------|-----------------------|
|           | 15-19                 | 20-35                 | 36-51                 | 52-64                 | More than 65          |
| Age group | <input type="radio"/> |

---

**Education \***

|                   |                       |                       |                       |                                      |
|-------------------|-----------------------|-----------------------|-----------------------|--------------------------------------|
|                   | Middle school diploma | High school diploma   | University degree     | Post-Graduate (Master, Ph.D., other) |
| Educational level | <input type="radio"/> | <input type="radio"/> | <input type="radio"/> | <input type="radio"/>                |

---

**Employment \***

|                 |                       |                       |                       |                       |
|-----------------|-----------------------|-----------------------|-----------------------|-----------------------|
|                 | Teacher               | Retired               | Student               | Other                 |
| Your employment | <input type="radio"/> | <input type="radio"/> | <input type="radio"/> | <input type="radio"/> |

---

**Do you live nearby the sea? \***

|             |                       |                       |
|-------------|-----------------------|-----------------------|
|             | Yes                   | No                    |
| Your answer | <input type="radio"/> | <input type="radio"/> |

---

Figure S1. SLR survey.

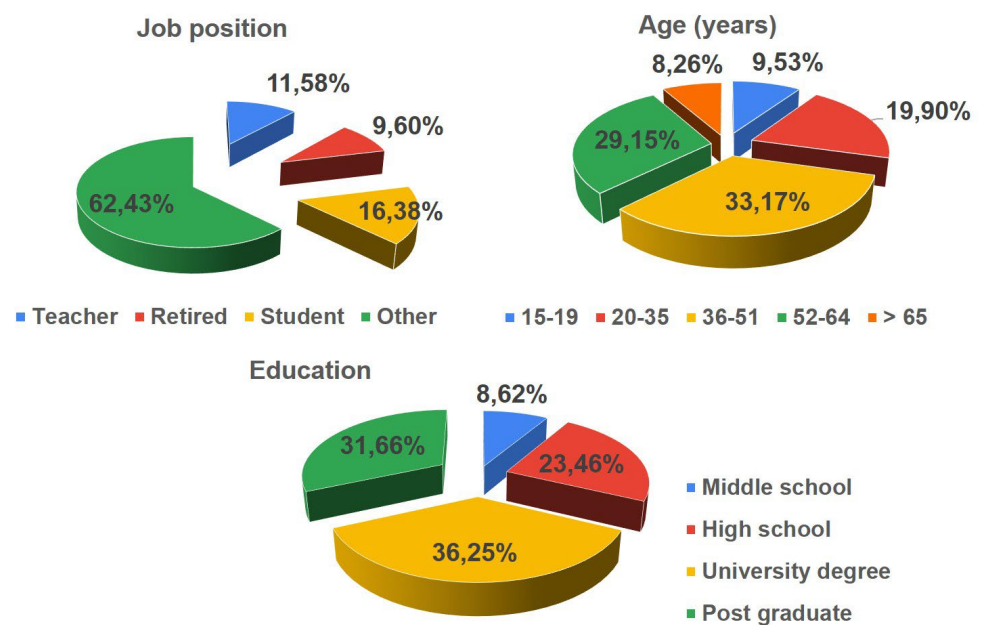

Figure S2. Pie charts of the job, age and education of the respondents.
